# Supplementary material for: PDGFR-alpha inhibits melanoma growth via CXCL10/IP-10: a multi-omics approach
Source: PubMed Central journal article supplement (PMC5363585; doi:10.18632/oncotarget.12629), 2016-10-13
Supplement: oncotarget-07-77257-s001.pdf [file oncotarget-07-77257-s001.pdf]

## PDGFR-alpha inhibits melanoma growth via CXCL10/IP-10: a multi-omics approach

### SUPPLEMENTARY FIGURES AND TABLES

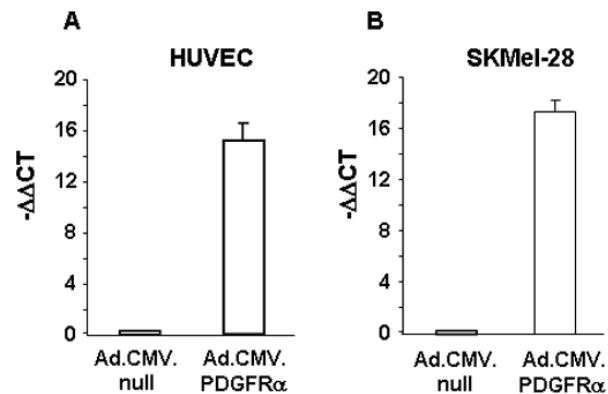

Supplementary Figure S1: qRT-PCR analysis shows the strong overexpression of PDGFR-alpha mRNA in HUVEC (N = 6) and SKMel-28 (N = 6) (A and B respectively) upon 30 MOI infection dose with AdCMV. PDGFR-alpha (48 hours).

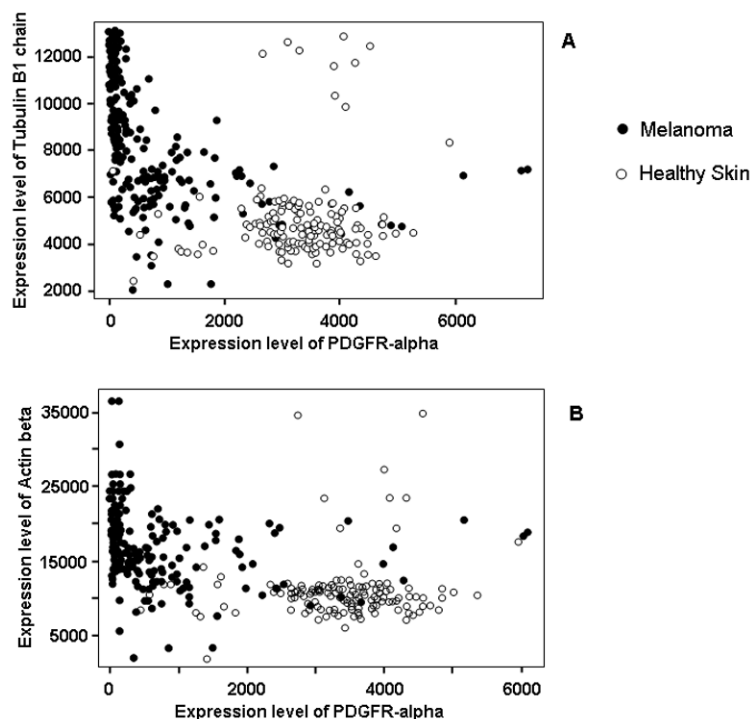

Supplementary Figure 2SA-2SB: reports correlation plots of PDGFR-alpha with housekeeping genes other than beta-2 microglobulin, namely Tubulin Beta 1 gene (S2A) and Actin beta gene (S2B). In all cases PDGFR-alpha is strongly reduced in melanoma samples vs normal skin samples.

**Supplementary Table S1: Differentially expressed transcripts in HUVEC cells overexpressing PDGFR-alpha vs Ad.null ctrl cells (216 genes). In bold the transcripts reported in Figure 2A.**

See Supplementary File 1

**Supplementary Table S2: Differentially expressed transcripts in SKMel-28 cells overexpressing PDGFR alpha vs Ad.null ctrl cells (107 genes). In bold the transcripts reported in Figure 2B.**

See Supplementary File 2

**Supplementary Table S3: Differentially expressed miRNAs in HUVEC cells overexpressing PDGFR-alpha vs Ad.null ctrl cells.**

See Supplementary File 3

**Supplementary Table S4: Differentially expressed miRNAs in SKMe-128 cells overexpressing PDGFR-alpha vs Ad.null ctrl cells**

| miRNA               | Fold-change | p-value |
|---------------------|-------------|---------|
| hsa-miR-630         | 3.48        | 0.00198 |
| hsa-miR-1977_v14.0  | 3.03        | 0.02592 |
| hsa-miR-135a*       | 2.70        | 0.04333 |
| hsa-miR-150*        | 2.68        | 0.00065 |
| hsa-miR-762         | 2.33        | 0.01027 |
| hsa-miR-575         | 2.27        | 0.01446 |
| hsa-miR-1246        | 2.00        | 0.01079 |
| hsa-miR-638         | 1.75        | 0.00562 |
| hsa-miR-1181        | 1.72        | 0.03901 |
| hsa-miR-1290        | 1.67        | 0.01835 |
| hsa-miR-1915        | 1.53        | 0.04932 |
| hsa-miR-424         | -1.52       | 0.03304 |
| hsa-miR-331-3p      | -1.53       | 0.04243 |
| hsa-miR-17          | -1.53       | 0.04787 |
| hsa-miR-129-3p      | -1.54       | 0.02699 |
| hsa-let-7i          | -1.56       | 0.02323 |
| hsa-miR-210         | -1.59       | 0.04883 |
| miRNABrightCorner30 | -1.63       | 0.03433 |
| hsa-miR-29b         | -1.68       | 0.04790 |
| hsa-miR-18a         | -2.11       | 0.04433 |
| hsa-miR-7           | -2.50       | 0.00383 |

**Supplementary Table S5A: Ingenuity pathway analysis of differentially expressed transcripts in HUVEC cells (networks). In capital letters genes from the input list.**

See Supplementary File 5

**Supplementary Table S5B: Ingenuity pathway analysis of differentially expressed transcripts in SKMel-28 cells (networks). In capital letters genes from the input list.**

See Supplementary File 6

**Supplementary Table S6: Differentially expressed mRNAs targeted by differentially expressed miRNAs (high prediction/experimental validation) in HUVEC cells.**

See Supplementary File 7
